# Supplementary material for: Magnetic Resonance Imaging–Guided Confirmatory Biopsy for Initiating Active Surveillance of Prostate Cancer
Source: PubMed Central journal article supplement (PMC6739900; doi:10.1001/jamanetworkopen.2019.11019), 2019-09-11
Supplement: jamanetwopen-2-e1911019-s001.pdf [file jamanetwopen-2-e1911019-s001.pdf]

## Supplementary Online Content

Jayadevan R, Felker ER, Kwan L, et al. Magnetic resonance imaging–guided confirmatory biopsy for initiating active surveillance of prostate cancer. *JAMA Netw Open*. 2019;2(9):e1911019. doi:10.1001/jamanetworkopen.2019.11019

**eTable 1.** Upgrading Summary by Confirmatory Biopsy Pathology

**eTable 2.** Patient Characteristics at Confirmatory Biopsy by Upgrading Status (N = 332)

This supplementary material has been provided by the authors to give readers additional information about their work.

**eTable 1. Upgrading Summary by Confirmatory Biopsy Pathology**

|                                                                             | <b>Total</b><br>N=332 | <b>Negative</b><br>n=114 | <b>GG1</b><br>n=175 | <b>GG2</b><br>n=43 |
|-----------------------------------------------------------------------------|-----------------------|--------------------------|---------------------|--------------------|
| ≥GG3 Upgrading, No. (%)                                                     | 39/332 (11.7)         | 9/114 (7.9)              | 20/175 (11.4)       | 10/43 (23.3)       |
| 1 <sup>st</sup> follow-up biopsy                                            | 21/146                | 3/53                     | 11/70               | 7/23               |
| 2 <sup>nd</sup> follow-up biopsy                                            | 10/110                | 5/40                     | 3/59                | 2/11               |
| 3 <sup>rd</sup> follow-up biopsy                                            | 2/51                  | 0/15                     | 2/29                | 0/7                |
| 4 <sup>th</sup> follow-up biopsy                                            | 4/14                  | 1/5                      | 2/8                 | 1/1                |
| 5 <sup>th</sup> follow-up biopsy                                            | 1/8                   | 0/1                      | 1/6                 | 0/1                |
| 6 <sup>th</sup> follow-up biopsy                                            | 1/3                   | 0/0                      | 1/3                 | 0/0                |
| Years from confirmatory biopsy to ≥GG3 upgrading, median (IQR) <sup>a</sup> | 2.0 (1.0, 3.3)        | 2.8 (2.0, 3.3)           | 1.9 (1.0, 3.4)      | 1.4 (1.0, 2.2)     |
| a. Median test p=0.11<br>Abbreviations: GG, Gleason Grade Group             |                       |                          |                     |                    |

**eTable 2.** Patient Characteristics at Confirmatory Biopsy by Upgrading Status (N=332)

|                                                                                                                                                                                                                                                                               | No upgrading      | Upgrading to ≥GG3 |                     |
|-------------------------------------------------------------------------------------------------------------------------------------------------------------------------------------------------------------------------------------------------------------------------------|-------------------|-------------------|---------------------|
|                                                                                                                                                                                                                                                                               | n=293             | n=39              |                     |
| Age, mean (SD), y                                                                                                                                                                                                                                                             | 62.6 (7.7)        | 64.2 (7.0)        | 0.22                |
| Race, No. (%) <sup>a</sup>                                                                                                                                                                                                                                                    |                   |                   |                     |
| Non-Hispanic white                                                                                                                                                                                                                                                            | 66 (23)           | 9 (23)            | 0.94                |
| Non-white                                                                                                                                                                                                                                                                     | 227 (77)          | 30 (77)           |                     |
| Family History of Prostate Cancer, No. (%)                                                                                                                                                                                                                                    |                   |                   |                     |
| No                                                                                                                                                                                                                                                                            | 225 (77)          | 27 (69)           | 0.30                |
| Yes                                                                                                                                                                                                                                                                           | 68 (23)           | 12 (31)           |                     |
| Palpable Abnormality, No. (%)                                                                                                                                                                                                                                                 |                   |                   |                     |
| No                                                                                                                                                                                                                                                                            | 105 (36)          | 12 (31)           | 0.62 <sup>a</sup>   |
| Yes                                                                                                                                                                                                                                                                           | 10 (3)            | 2 (5)             |                     |
| Confirmatory Pathology, No. (%)                                                                                                                                                                                                                                               |                   |                   |                     |
| Negative                                                                                                                                                                                                                                                                      | 105 (36)          | 9 (23)            | 0.03                |
| GG1                                                                                                                                                                                                                                                                           | 155 (53)          | 20 (51)           |                     |
| GG2                                                                                                                                                                                                                                                                           | 33 (11)           | 10 (26)           |                     |
| Reasons for End of Follow-up, No. (%)                                                                                                                                                                                                                                         | n=58              | n=35              |                     |
| Non-prostate cancer death                                                                                                                                                                                                                                                     | 2 (1)             | 1 (3)             | 0.40 <sup>b</sup>   |
| Followed elsewhere                                                                                                                                                                                                                                                            | 9 (3)             | 2 (5)             |                     |
| Lost to Follow-up                                                                                                                                                                                                                                                             | 2 (1)             | 3 (8)             |                     |
| Received treatment                                                                                                                                                                                                                                                            | 45 (15)           | 29 (74)           |                     |
| MRI Grade <sup>c</sup> , No. (%)                                                                                                                                                                                                                                              |                   |                   |                     |
| No Target                                                                                                                                                                                                                                                                     | 89 (31)           | 14 (36)           | 0.28                |
| 3                                                                                                                                                                                                                                                                             | 127 (43)          | 12 (31)           |                     |
| 4                                                                                                                                                                                                                                                                             | 62 (21)           | 12 (31)           |                     |
| 5                                                                                                                                                                                                                                                                             | 15 (5)            | 1 (3)             |                     |
| Prostate volume, median (IQR), mL                                                                                                                                                                                                                                             | 50.0 (34.0, 71.0) | 42.0 (36.0, 52.8) | 0.36 <sup>d</sup>   |
| PSA, median (IQR), ng/mL                                                                                                                                                                                                                                                      | 4.6 (2.4, 7.0)    | 5.5 (4.0, 8.2)    | 0.03 <sup>d</sup>   |
| PSA density, median (IQR), ng/mL/mL                                                                                                                                                                                                                                           | 0.08 (0.05, 0.12) | 0.12 (0.07, 0.19) | 0.002 <sup>d</sup>  |
| Years in active surveillance                                                                                                                                                                                                                                                  | 4.1 (2.9, 6.1)    | 2.0 (1.0, 3.2)    | <0.001 <sup>d</sup> |
| Maximum cancer core length, median (IQR), mm                                                                                                                                                                                                                                  | 2.0 (1.0, 4.0)    | 3.1 (1.5, 5.0)    | 0.12 <sup>d</sup>   |
| % Tumor involvement, median (IQR)                                                                                                                                                                                                                                             | 15.0 (5.0, 30.0)  | 27.5 (15.0, 40.0) | 0.04 <sup>d</sup>   |
| % Free PSA, median (IQR)                                                                                                                                                                                                                                                      | 19.0 (14.0, 25.0) | 14.0 (10.5, 17.0) | <0.001 <sup>d</sup> |
| a. Non-white race includes African Americans, Hispanics, Asians, and "other"<br>b. Fisher's exact test<br>c. If PI-RADS v2 score unavailable, UCLA prostate lesion score was used<br>d. Median test<br>Abbreviations: GG, Gleason Grade Group; PSA, prostate specific antigen |                   |                   |                     |
